# Supplementary material for: Rational design of multiple sections in ferroelectric photovoltaics for enhanced current density
Source: Royal Society of Chemistry journal article supplement (doi:10.1039/d5tc04071j), 2026-01-01
Supplement: d5tc04071j1.pdf [file d5tc04071j1.pdf]

## Supporting Information of Rational design of multiple sections in ferroelectric photovoltaics for enhanced current density

Kun Yao Liang, Hao Huang, Ye Feng Wang, Ke Zhen Hui, Tian Yi Hu, Jing Hui Zeng\*

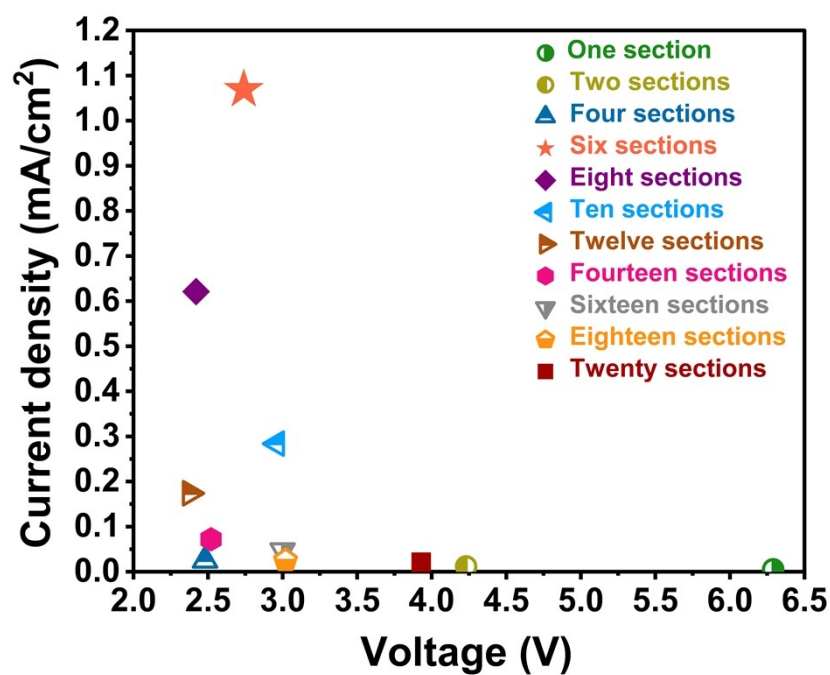

Fig. S1 The photovoltaic performance of the devices with different sections.

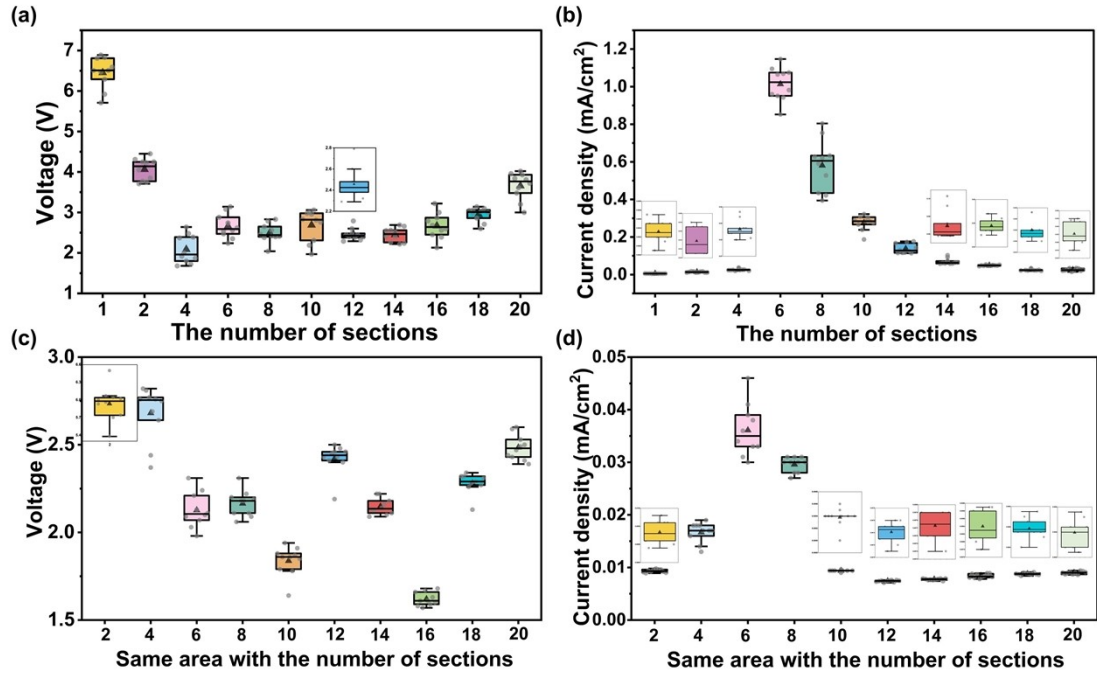

**Fig. S2** (a) Boxing plot of the open circuit voltage of the devices with different sections; (b) boxing plot of the current density of the devices with different sections; (c) the boxing plot of the open circuit voltage for single circuit with the same areas as the different sections; (d) the boxing plot of the current density for single circuit with the same areas as the different sections.
